# Supplementary material for: Hypoxia-induced up-regulation of VASP promotes invasiveness and metastasis of hepatocellular carcinoma
Source: PubMed Central journal article supplement — Theranostics. 2018 Sep 9;8(17):4649–63. doi: 10.7150/thno.26789 (PMC6160773; doi:10.7150/thno.26789), 2018-09-09
Supplement: thnov08p4649s1.pdf [file thnov08p4649s1.pdf]

## Supplementary Figure 1

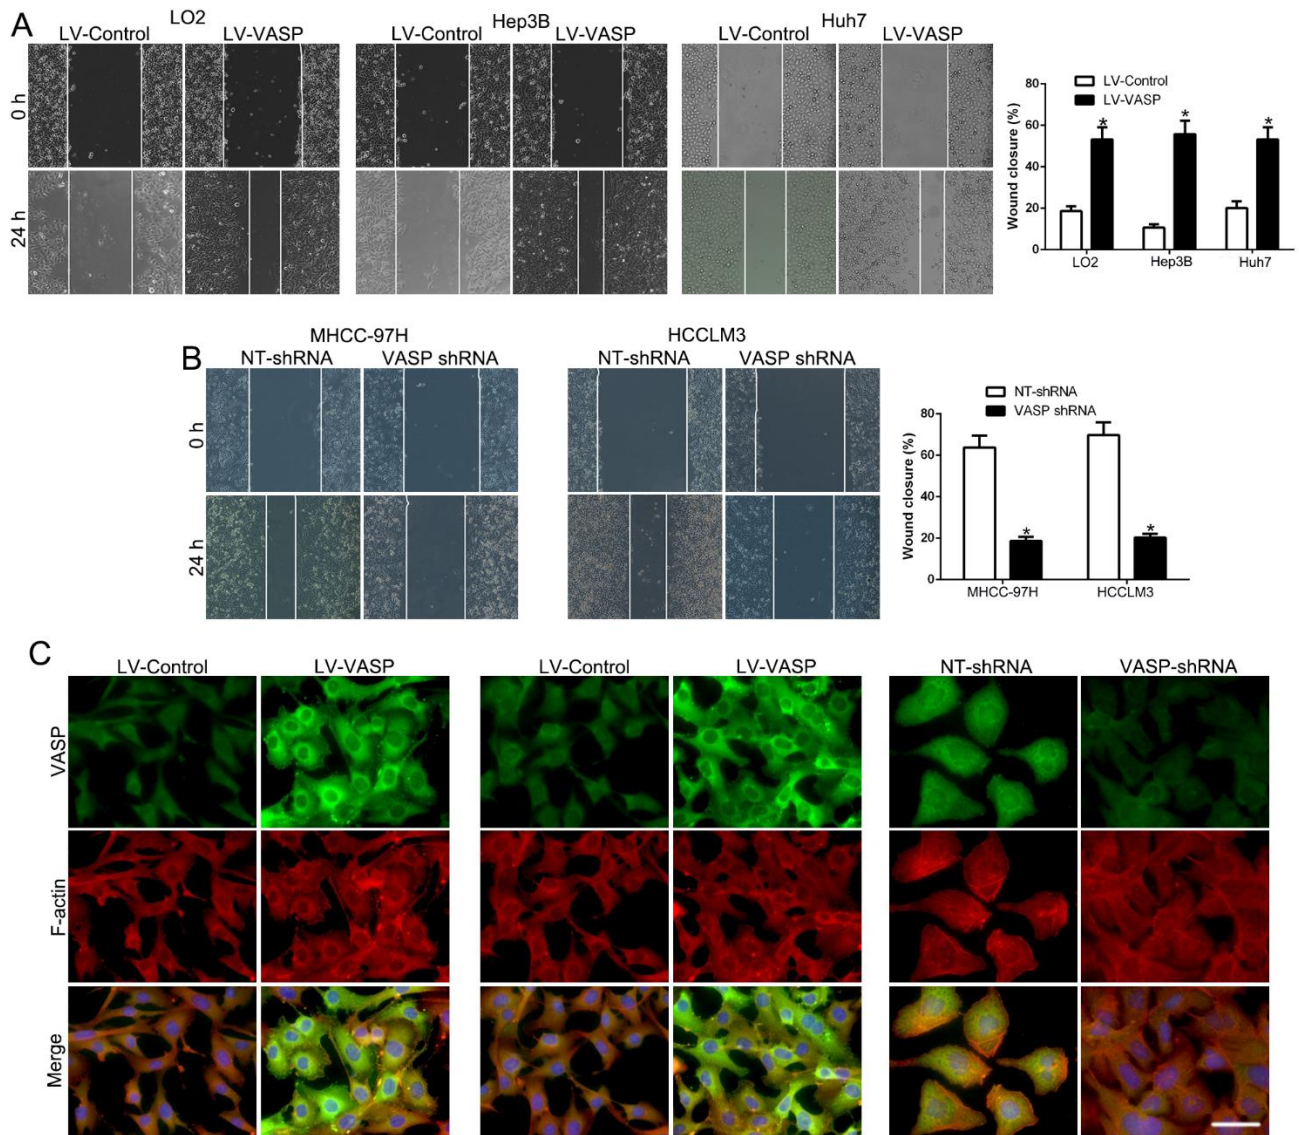

**Supplementary Figure 1. VASP promotes HCC cell migration.** (A) Wound-healing assays comparing the migration of cells transfected with VASP for 24 h. (B) Wound-healing assays comparing the migration of cells transfected with VASP shRNA for 24 h. (C) Confocal images of LO2 and Hep3B (left) transfected with LV-VASP and MHCC-97H (right) cells transfected with VASP shRNA stained for F-actin (red) and 4',6-diamidino-2-phenylindole (DAPI; blue) (magnification, 400×). The merged images showing yellow immunofluorescence indicated colocalization.

## Supplementary Figure 2

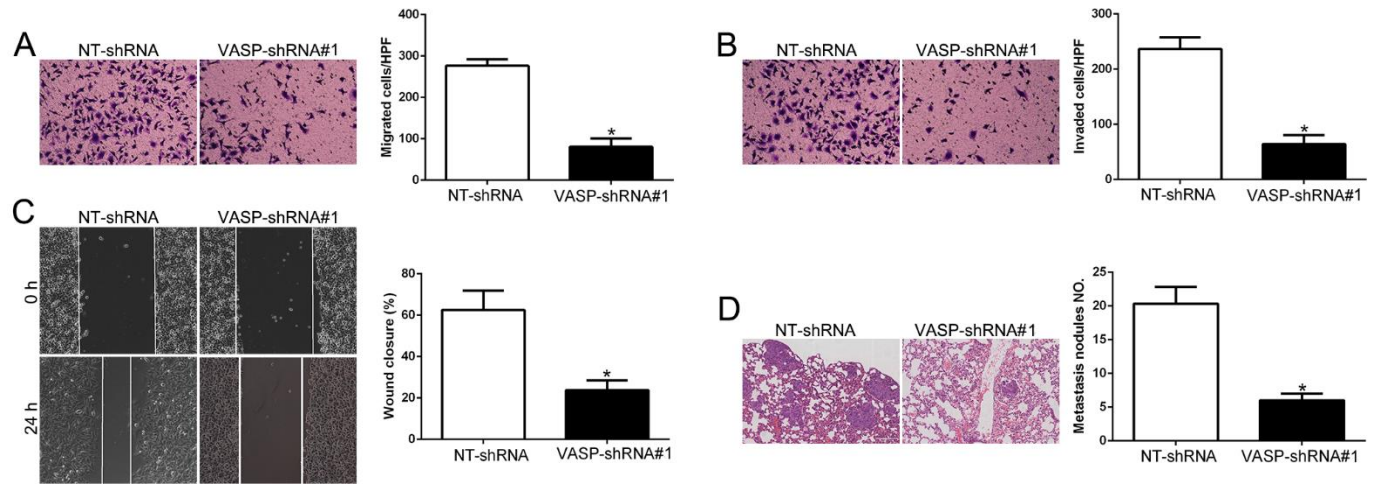

### Supplementary Figure 2. VASP knockdown inhibits HCC cell migration and invasion.

Transwell assays was used to show that VASP knockdown inhibits HCCLM3 cell migration (**A**) and invasion (**B**). (**C**) Wound healing assays showed that VASP knockdown suppresses HCCLM3 cell migration. (**D**) Representative hematoxylin and eosin (H&E) images of metastatic nodules from the mouse lung tissue sections of the HCCLM3 NT-shRNA group (left) and HCCLM3 VASP-shRNA#1 group (right). \*P<0.05.

## Supplementary Figure 3

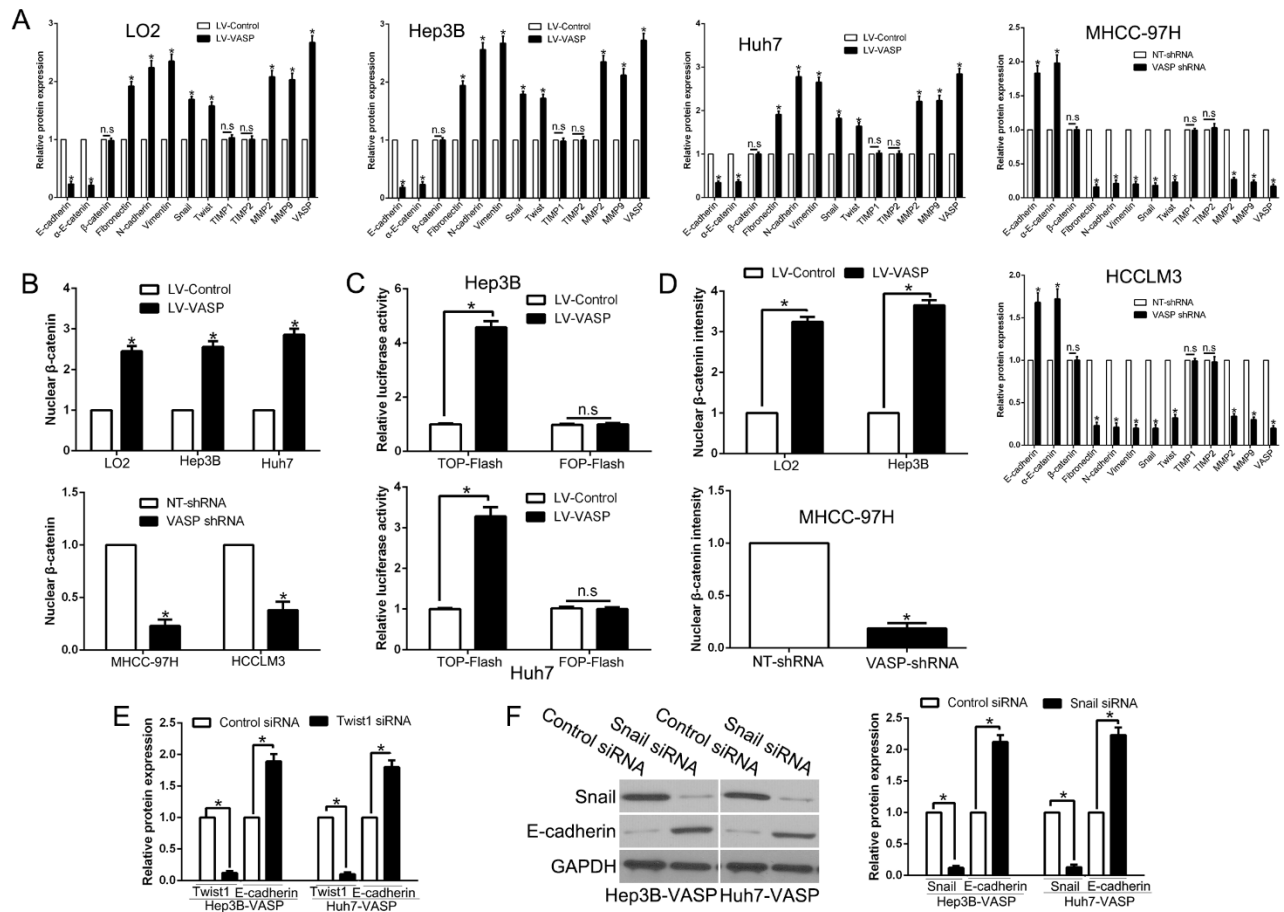

**Supplementary Figure 3. VASP induces EMT and  $\beta$ -catenin nuclear translocation. (A)** Quantitative analysis of the expression of EMT-associated markers after VASP alteration. **(B)** Quantitative analysis of levels of  $\beta$ -catenin in nuclear and cytosolic fraction detected by Western blotting. **(C)** Top/Fop flash assays detected the  $\beta$ -catenin transcription activity. **(D)** Quantitative analysis of levels of  $\beta$ -catenin in nuclear and cytosolic fraction detected by IF. **(E)** Quantitative analysis of levels in Hep3B LV-VASP or Huh7 LV-VASP cells transfected with siRNA targeting Twist1 (Twist1 siRNA) or scrambled siRNA (Control siRNA). **(F)** Immunoblots were performed to detect expression of indicated proteins in Hep3B LV-VASP or Huh7 LV-VASP cells transfected with siRNA targeting Snail (Snail siRNA) or scrambled siRNA (Control siRNA).

**Supplementary Figure 4**

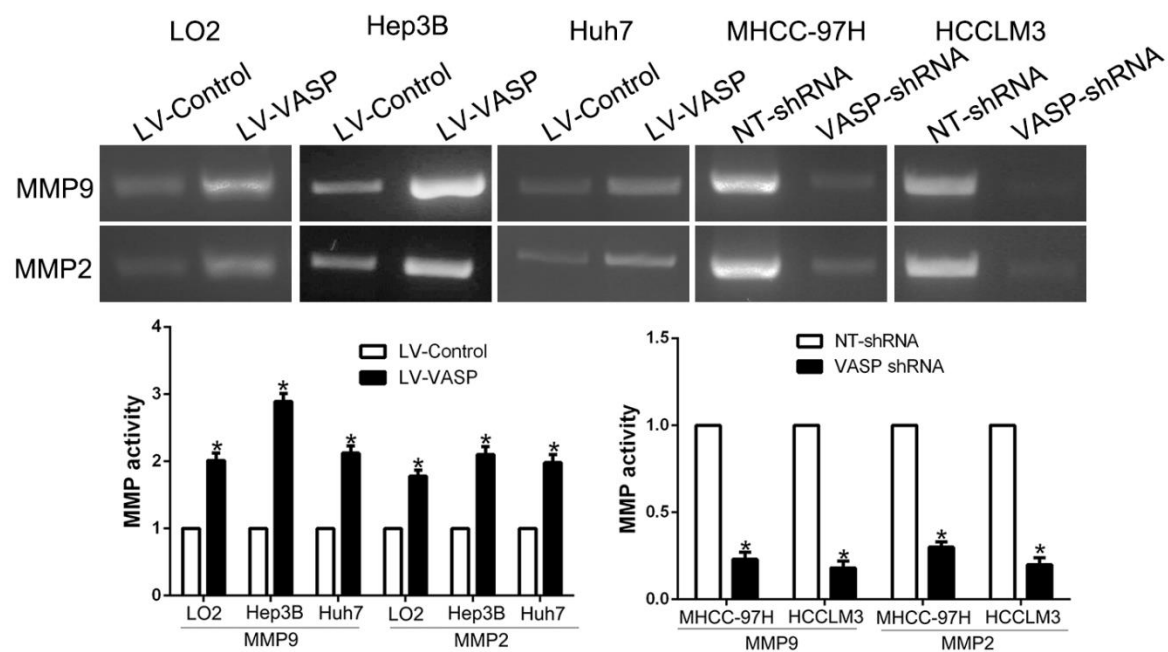

**Supplementary Figure 4. Zymography detects activities of MMP2 and MMP9.** The bottom histogram shows the average optical density from three repeated experiments.

## Supplementary Figure 5

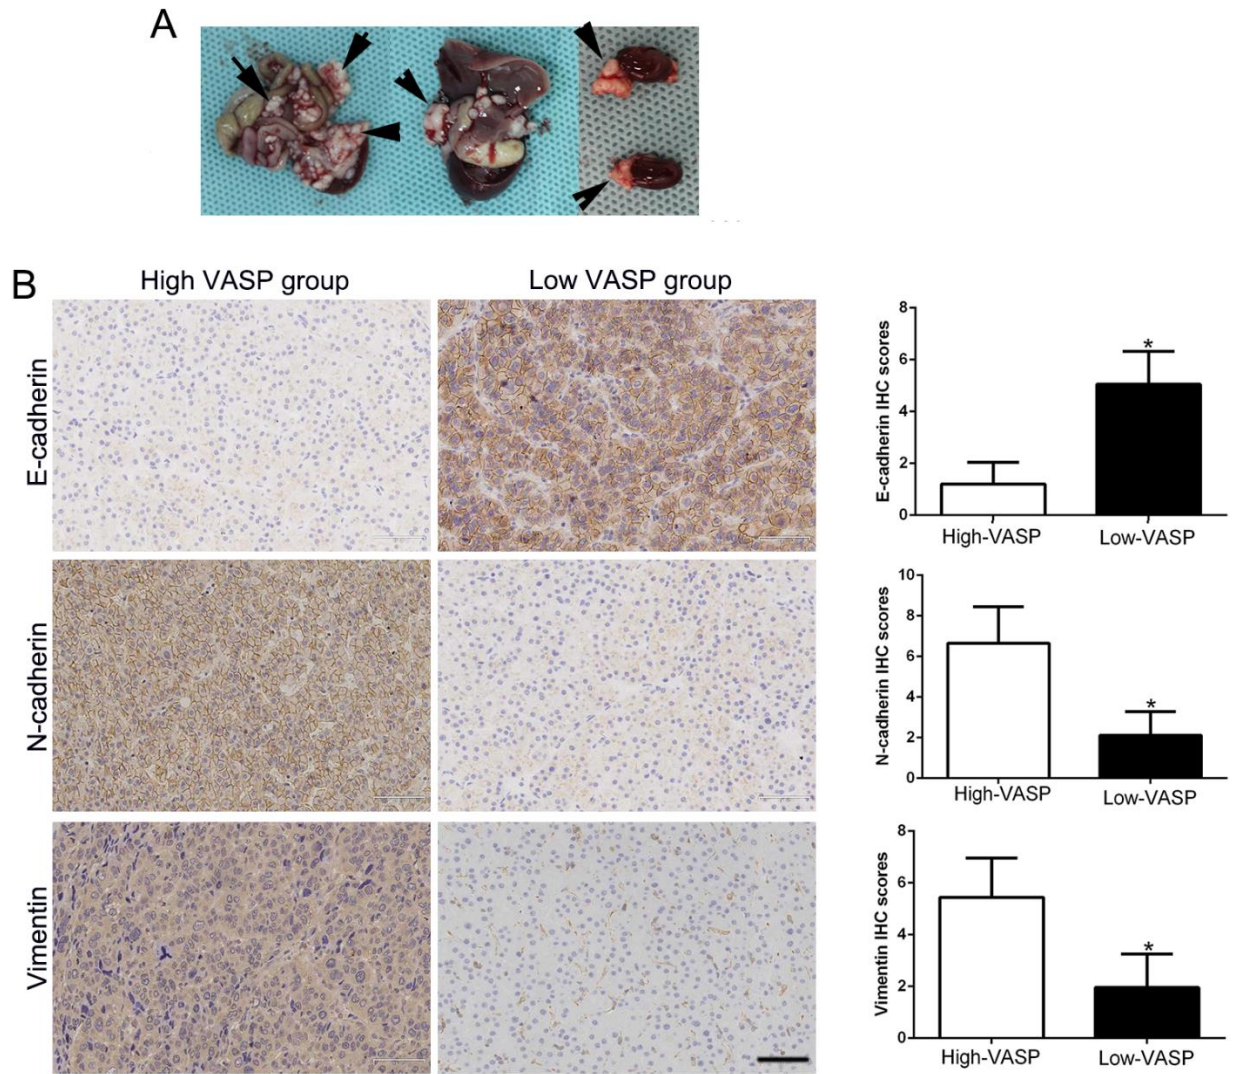

**Supplementary Figure 5. VASP promotes metastasis of HCC cells in vivo and positively correlates with EMT markers in HCC tissues.** (A) Representative images of metastatic tumors of liver, kidney, and mesentery are shown. (B) Immunohistochemical analysis of E-cadherin, N-cadherin, and Vimentin in HCC samples. In cases of low VASP expression (right), there is strong E-cadherin and no detectable N-cadherin and Vimentin protein expression in the same tissue section. In contrast, in the case of high VASP expression (left), there is no detectable E-cadherin and strong N-cadherin and Vimentin protein expression. Values are depicted as Mean  $\pm$  SEM; \* $P < 0.05$  by t-test.

Supplementary Figure 6

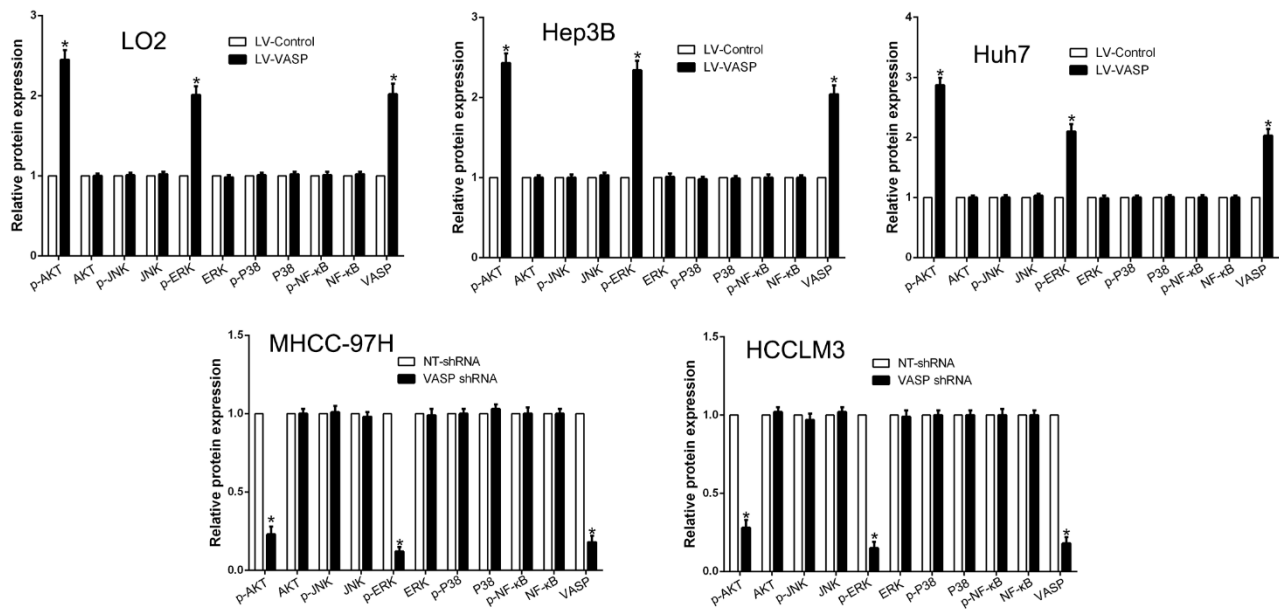

Supplementary Figure 6. Western blotting detects estimated amounts of VASP in AKT, ERK, JNK, MAPK, and NF-κB pathways in indicated cells

## Supplementary Figure 7

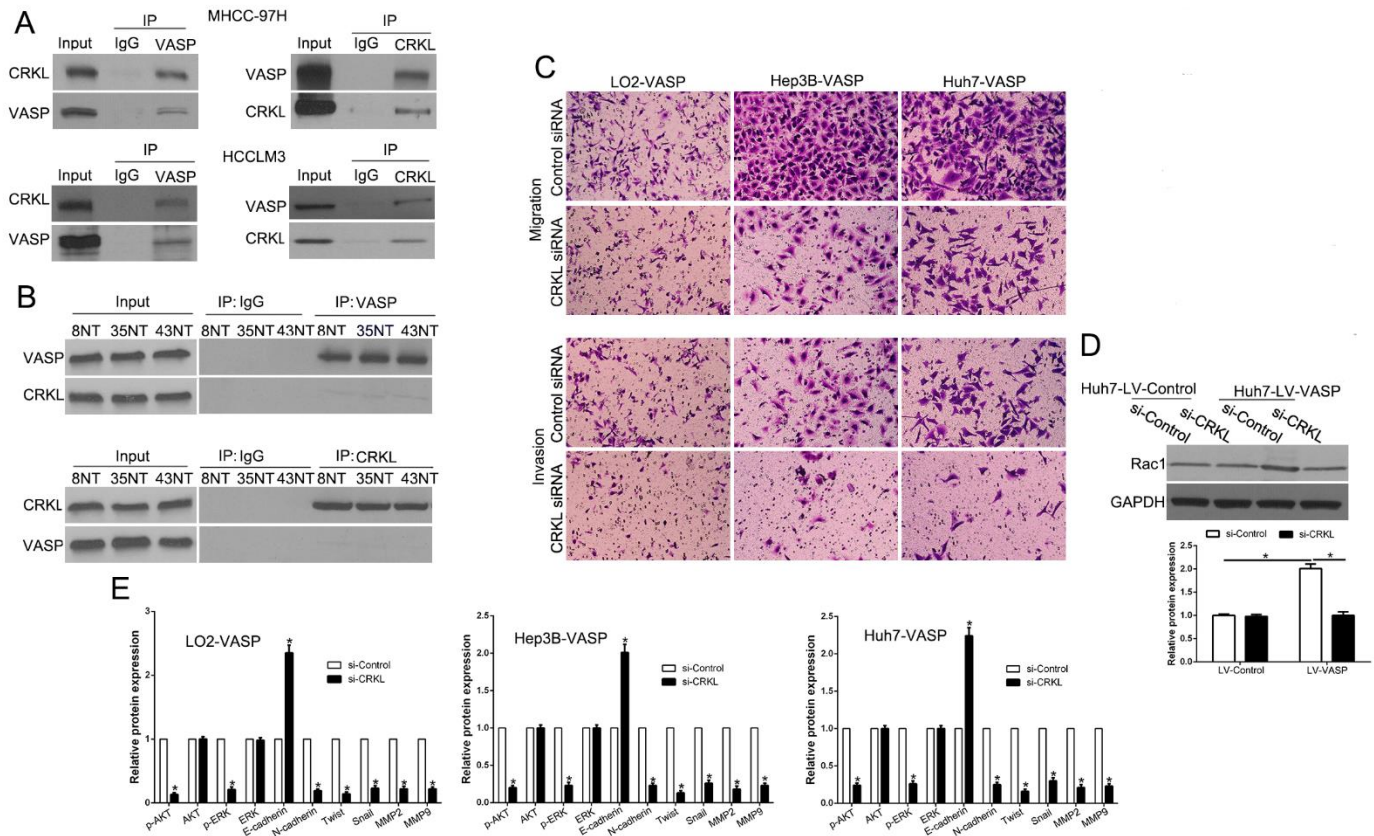

**Supplementary Figure 7. CRKL dynamically interacts with VASP and mediates its functional effects.** (A) Co-IP analysis of the interaction between VASP protein and CRKL protein in HCC cells. (B) Co-IP analysis of the interaction between VASP protein and CRKL protein in adjacent non-tumor tissues. (C) Transwell assay for migration and invasion was performed in the cells overexpressing VASP and corresponding cells in control group which were transfected with CRKL siRNA or control siRNA. The assay was carried out 48 h after transfection. (D) Western blotting detected Rac1 expression in the cells overexpressing VASP. The cells in the control group were transfected with CRKL siRNA or control siRNA and the analysis was performed 48 h after transfection. (E) Quantitative analysis of the protein in cells overexpressing VASP and corresponding cells in the control group transfected with CRKL siRNA or control siRNA. Cells were subjected to Western blotting for EMT markers 48 h after transfection

## Supplementary Figure 8

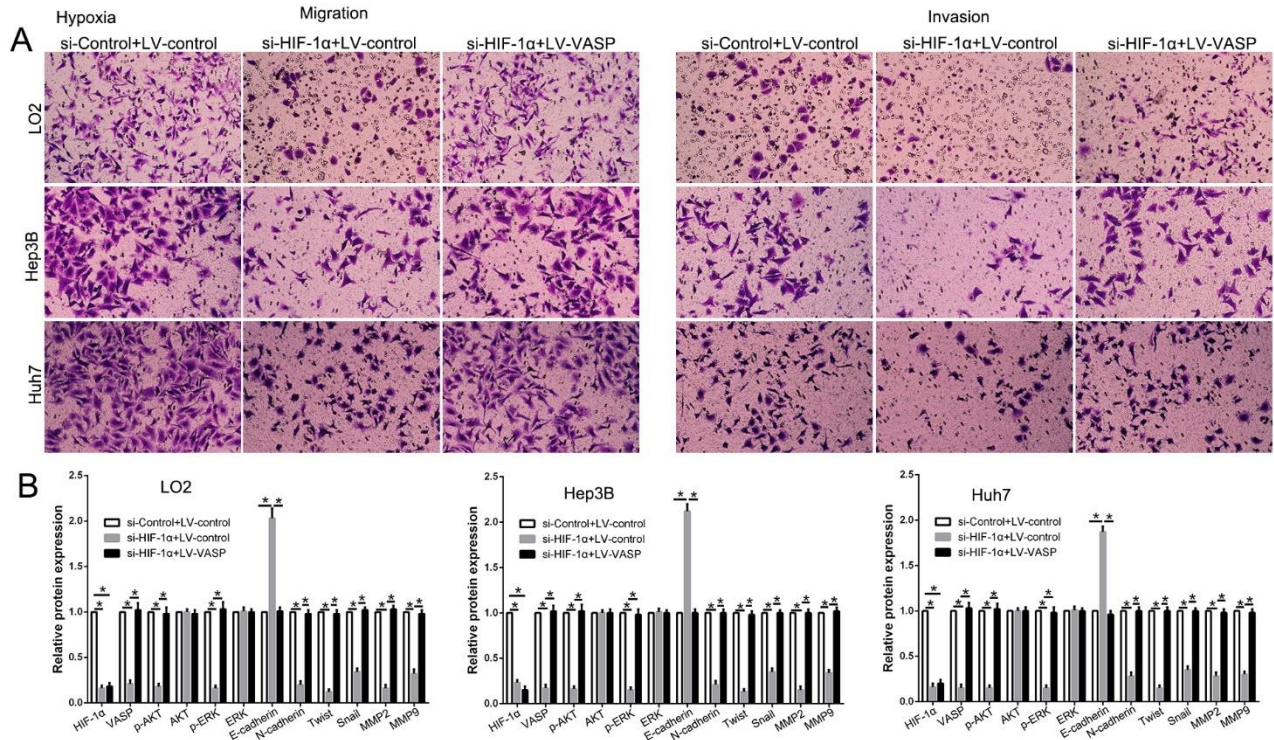

**Supplementary Figure 8. HIF-1 $\alpha$  mediates hypoxia-induced VASP overexpression on EMT.** (A) HIF-1 $\alpha$  siRNA was transfected into LO2, Hep3B, and Huh7 cells to knock down HIF-1 $\alpha$  in hypoxic condition. The Transwell assays for migration and invasion (A) were performed and (B) quantitative analysis of the EMT protein markers detected by Western blotting.

## Supplementary Figure 9

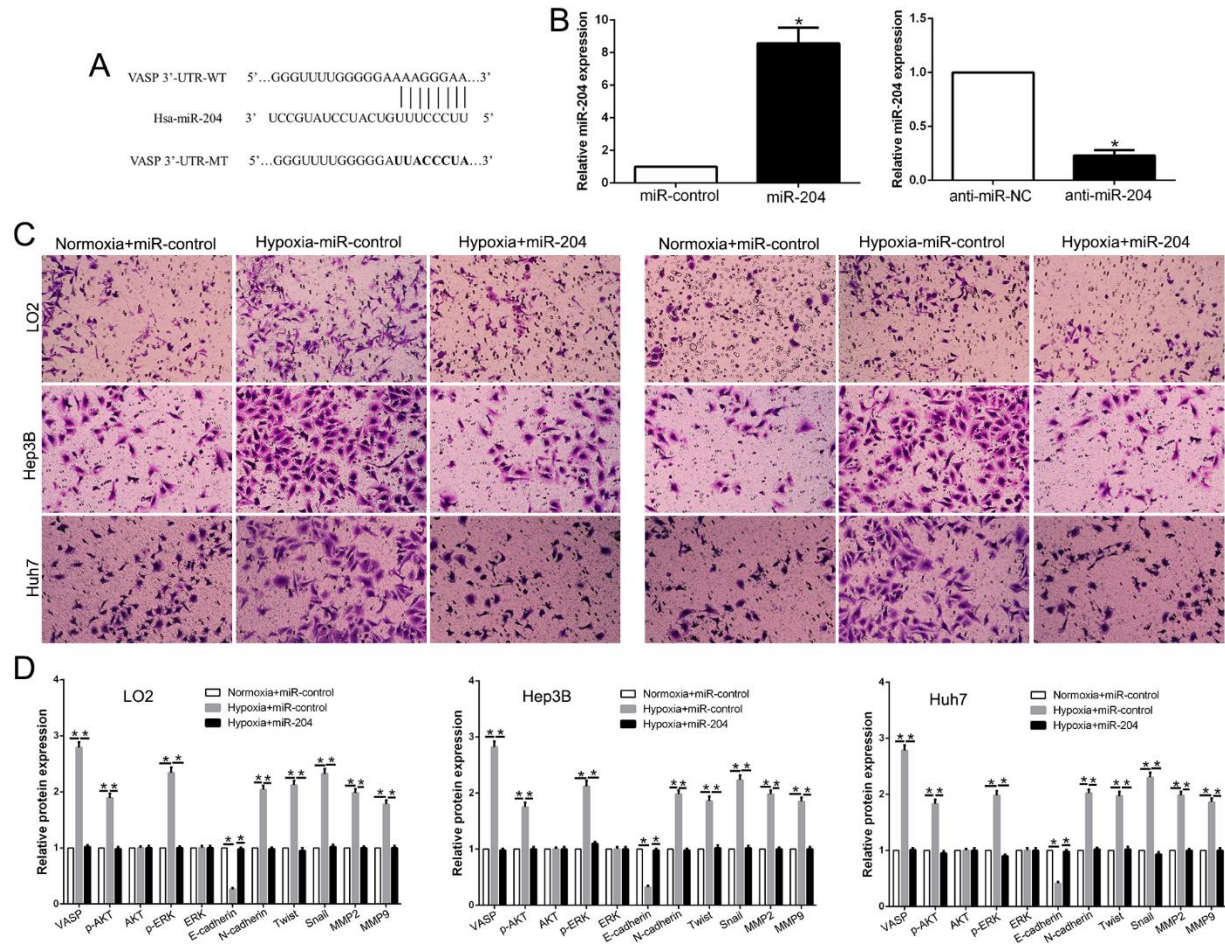

**Supplementary Figure 9. Restoration of miR-204 reversed the hypoxia-induced effects on HCC cells.** (A) MiR-204 and its putative binding sequence in the 3'-UTR of VASP. (B) qRT-PCR was performed to confirm the overexpression or knockdown of miR-204. \*,  $P < 0.05$  by t-test. (C-D) LO2, Hep3B, and Huh7 cells cultured in normoxic or hypoxic condition were transduced with miR-204 vector and were subjected to the Transwell assay for migration and invasion (C) and (D) quantitative analysis of the EMT protein markers detected by Western blotting.

## Supplementary Figure 10

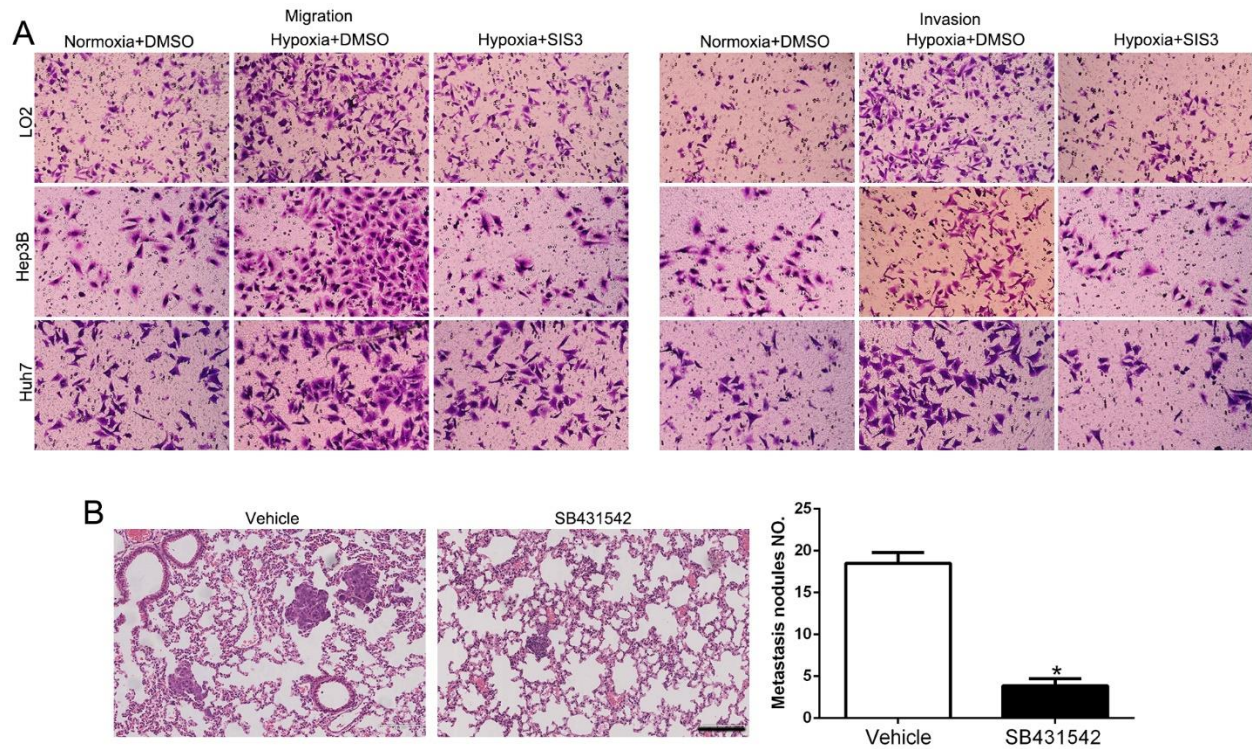

**Supplementary Figure 10. The p-Smad3 inhibitor abolished the effects of hypoxia on HCC cells.** (A) LO2, Hep3B, and Huh7 cells cultured under the normoxic or hypoxic condition were treated with p-Smad3 inhibitor, SIS3, and were subjected to the Transwell for migration and invasion. (B) p-Smad3 inhibitor, SB431542, significantly inhibited the numbers of lung metastases.

## Supplementary Figure 11

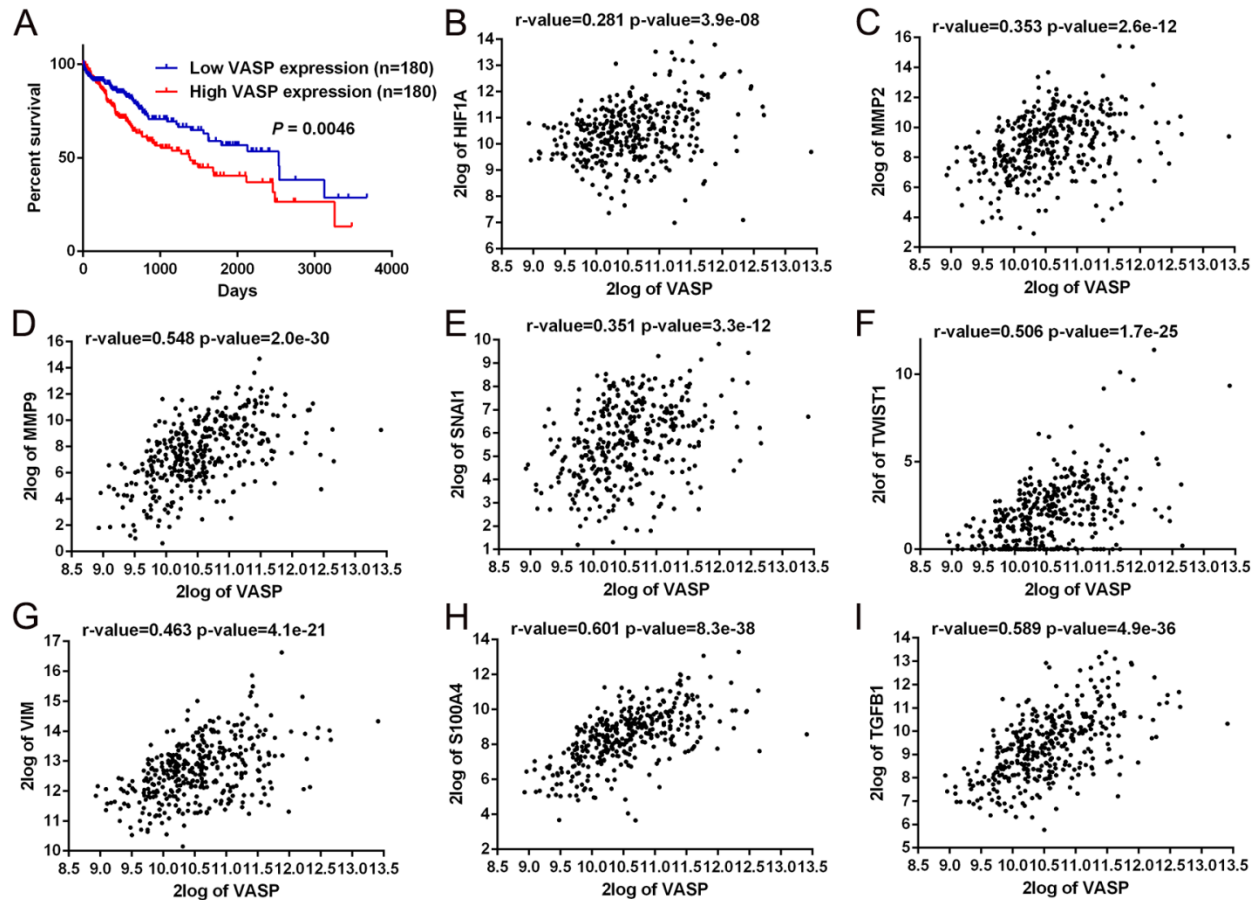

**Supplementary Figure 11. The publicly available database showed the relationship between VASP and EMT associated factors.** (A) The publicly available database compiled in The Human Protein Atlas showed that high expression of VASP had a worse overall survival. (B-I) Data from R2: Genomics Analysis and Visualization Platform database showed that VASP expression has a positive correlation with the expression of different proteins.

**Supplementary Figure 12**

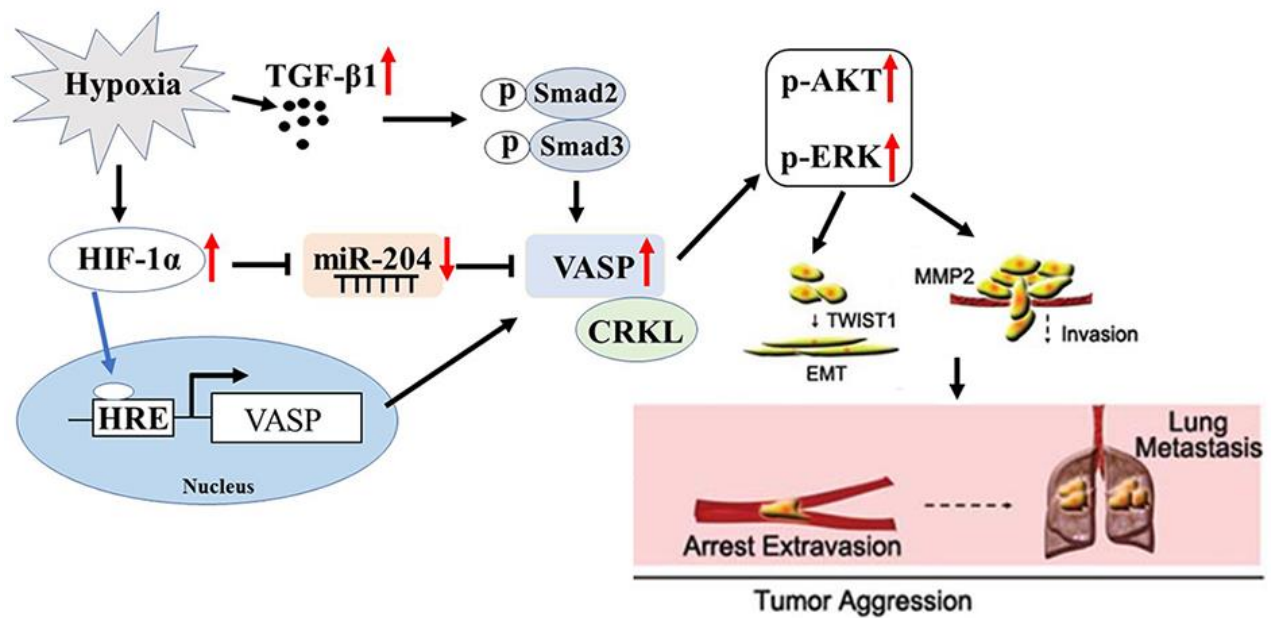

**Supplementary Figure 12. Working model for the oncogenic function of VASP and its upstream and downstream pathways.** VASP promotes the metastasis of HCC cells by activating AKT and ERK pathways. Hypoxia/HIF-1 $\alpha$  signaling upregulates VASP expression in HCC cells by multiple mechanisms.

**Supplementary table 1. Clinical correlation of VASP expression in HCC (n = 126).**

| Clinical parameters | Cases (n) | Expression level            |                            | <i>P</i> value<br>(* <i>p</i> <0.05) |
|---------------------|-----------|-----------------------------|----------------------------|--------------------------------------|
|                     |           | VASP <sup>high</sup> (n=65) | VASP <sup>low</sup> (n=61) |                                      |
| Age(years)          |           |                             |                            |                                      |
| < 60 years          | 74        | 38                          | 36                         | 0.950                                |
| ≥60 years           | 52        | 27                          | 25                         |                                      |
| Gender              |           |                             |                            |                                      |
| Male                | 101       | 51                          | 50                         | 0.622                                |
| Female              | 25        | 14                          | 11                         |                                      |
| Tumor size (cm)     |           |                             |                            | 0.486                                |
| <5cm                | 66        | 36                          | 30                         |                                      |
| ≥5cm                | 60        | 29                          | 31                         |                                      |
| Tumor number        |           |                             |                            | <b>0.006*</b>                        |
| solitary            | 106       | 49                          | 57                         |                                      |
| multiple            | 20        | 16                          | 4                          |                                      |
| Edmondson           |           |                             |                            | 0.065                                |
| I+II                | 32        | 12                          | 20                         |                                      |
| III+IV              | 94        | 53                          | 41                         |                                      |
| TNM stage           |           |                             |                            | <b>0.004*</b>                        |
| I+II                | 95        | 42                          | 53                         |                                      |
| III+IV              | 31        | 23                          | 8                          |                                      |
| Venous infiltration |           |                             |                            | <b>0.004*</b>                        |
| Present             | 26        | 20                          | 6                          |                                      |
| Absent              | 100       | 45                          | 55                         |                                      |
| AFP                 |           |                             |                            | 0.930                                |
| <400ng/ml           | 48        | 25                          | 23                         |                                      |
| ≥400ng/ml           | 78        | 40                          | 38                         |                                      |
| HBsAg               |           |                             |                            | 0.623                                |
| positive            | 114       | 58                          | 56                         |                                      |
| negative            | 12        | 7                           | 5                          |                                      |

HCC, hepatocellular carcinoma; AFP, alpha-fetoprotein; TNM, tumor-node-metastasis. \*Statistically significant.

**Supplementary table 2. Cox proportional hazard regression analyses for 5-year survival.**

| Variables           | Univariate analysis |              |               | Multivariate analysis |              |               |
|---------------------|---------------------|--------------|---------------|-----------------------|--------------|---------------|
|                     | HR                  | 95% CI       | <i>P</i>      | HR                    | 95% CI       | <i>P</i>      |
| Age                 | 0.845               | 0.352-1.869  | 0.658         | 1.128                 | 0.706-1.759  | 0.632         |
| Gender              | 0.678               | 0.308-1.462  | 0.316         | 1.013                 | 0.548-1.863  | 0.972         |
| TNM stage           | 2.565               | 1.413-4.687  | <b>0.002*</b> | 3.347                 | 1.479-7.528  | <b>0.004*</b> |
| NO. of tumor nodule | 9.906               | 3.235-20.328 | <b>0.000</b>  | 9.215                 | 2.806-25.462 | <b>0.000</b>  |
| Venous infiltration | 2.546               | 1.114-5.526  | <b>0.017</b>  | 0.925                 | 0.385-2.987  | 0.915         |
| VASP upregulation   | 5.203               | 2.310-11.403 | <b>0.000</b>  | 4.958                 | 1.945-12.654 | <b>0.001</b>  |

HR, hazard ratio; CI, confidence interval; \* statistically significant.

**Supplementary** Table 3. The sequences of walking primers of HIF-1 $\alpha$  combines the promoter of VASP.

| Primer | Sequence               |
|--------|------------------------|
| HRE1F  | TGGTGAAATCCCATCTCTACTA |
| HRE1R  | TGTAGTCTCTCGCTGTCACC   |
| HRE2F  | TTAGTCTACCCATTCTCCCA   |
| HRE2R  | ATGTTGTCCTGACCTCCTTT   |
| HRE3F  | CCCAGGTAAAGGAGGTCAGG   |
| HRE3R  | GGAAAGCCACCAAGGTCTG    |
| HRE4F  | GCGCGACCAAATCAGTGA     |
| HRE4R  | CGGAGGACAGCAGGATCA     |
| HRE5F  | TTACACACCAAAGAAGCCG    |
| HRE5R  | AAGGTGAGGAGGAAGTGGG    |
| HRE6F  | GCGGTGTTCCGAAGATGG     |
| HRE6R  | CTTCCTAGTTCGCTCCCAC    |
| HRE7F  | GAACCTCTCATCAGACCGCC   |
| HRE7R  | ATGGCTGCTCGGCGGGCGGG   |

**Supplementary Table 4.** Significantly deregulated miRNAs (> 2fold) comparing Control-MHCC-97L cells and Hypoxia-treated MHCC-97L cells by miRNA array.

| ProbeSet | miRNAs           | Normalized expression |         | Fold change (FC) | Log FC |
|----------|------------------|-----------------------|---------|------------------|--------|
|          |                  | Hypoxia               | Nomoxia |                  |        |
| 20525587 | hsa-miR-6813-5p  | 5.056                 | 2.135   | 7.573            | 2.921  |
| 20525591 | hsa-miR-6815-5p  | 4.241                 | 1.931   | 4.958            | 2.310  |
| 20519413 | hsa-miR-4638-5p  | 4.436                 | 2.288   | 4.433            | 2.148  |
| 20525731 | hsa-miR-6885-5p  | 3.274                 | 1.228   | 4.129            | 2.046  |
| 20501202 | hsa-miR-362-3p   | 4.214                 | 2.246   | 3.912            | 1.968  |
| 20525392 | hsa-miR-6721-5p  | 4.087                 | 2.194   | 3.713            | 1.893  |
| 20506818 | hsa-miR-1290     | 5.798                 | 3.937   | 3.630            | 1.860  |
| 20517817 | hsa-miR-3610     | 3.149                 | 1.299   | 3.606            | 1.850  |
| 20518785 | hsa-miR-4417     | 4.659                 | 2.888   | 3.413            | 1.771  |
| 20500483 | hsa-miR-221-5p   | 4.482                 | 2.784   | 3.245            | 1.698  |
| 20501177 | hsa-miR-99b-3p   | 0.971                 | 2.663   | -3.232           | -1.692 |
| 20504326 | hsa-miR-590-5p   | 3.123                 | 1.447   | 3.196            | 1.676  |
| 20525440 | hsa-miR-6739-5p  | 5.918                 | 7.576   | -3.157           | -1.659 |
| 20518455 | hsa-miR-3927-3p  | 2.394                 | 4.04    | -3.129           | -1.646 |
| 20525563 | hsa-miR-6801-5p  | 2.668                 | 1.033   | 3.107            | 1.636  |
| 20501278 | hsa-miR-328-3p   | 1.153                 | 2.785   | -3.099           | -1.632 |
| 20536811 | hsa-mir-4531     | 2.246                 | 0.627   | 3.071            | 1.619  |
| 20500197 | hsa-miR-16-2-3p  | 4.240                 | 2.675   | 2.959            | 1.565  |
| 20525502 | hsa-miR-6770-3p  | 2.129                 | 0.598   | 2.889            | 1.531  |
| 20525739 | hsa-miR-6889-5p  | 5.533                 | 4.016   | 2.861            | 1.517  |
| 20515536 | hsa-miR-378b     | 4.987                 | 3.474   | 2.854            | 1.513  |
| 20519609 | hsa-miR-4750-5p  | 6.453                 | 4.952   | 2.830            | 1.501  |
| 20506847 | hsa-miR-1254     | 3.770                 | 2.308   | 2.755            | 1.462  |
| 20519488 | hsa-miR-4684-3p  | 2.828                 | 1.376   | 2.736            | 1.452  |
| 20526182 | hsa-miR-7112-5p  | 4.982                 | 3.544   | 2.710            | 1.438  |
| 20504564 | hsa-miR-1296-5p  | 2.358                 | 3.792   | -2.702           | -1.434 |
| 20500443 | hsa-miR-34a-3p   | 2.150                 | 0.728   | 2.679            | 1.421  |
| 20525695 | hsa-miR-6867-5p  | 3.094                 | 4.495   | -2.641           | -1.401 |
| 20525479 | hsa-miR-6759-5p  | 2.668                 | 1.273   | 2.631            | 1.396  |
| 20529134 | hsa-miR-6516-5p  | 2.357                 | 0.964   | 2.626            | 1.393  |
| 20518870 | hsa-miR-4479     | 2.353                 | 0.967   | 2.612            | 1.385  |
| 20515632 | hsa-miR-3192-5p  | 1.986                 | 0.617   | 2.583            | 1.369  |
| 20518825 | hsa-miR-4448     | 4.308                 | 2.943   | 2.577            | 1.365  |
| 20518838 | hsa-miR-4458     | 4.000                 | 2.641   | 2.565            | 1.359  |
| 20517838 | hsa-miR-3622b-5p | 2.738                 | 1.387   | 2.550            | 1.351  |
| 20518926 | hsa-miR-4526     | 4.348                 | 3.006   | 2.535            | 1.342  |
| 20525434 | hsa-miR-6736-5p  | 2.961                 | 4.293   | -2.518           | -1.332 |
| 20503883 | hsa-miR-503-3p   | 1.674                 | 0.346   | 2.510            | 1.328  |
| 20525492 | hsa-miR-6765-3p  | 3.421                 | 2.095   | 2.507            | 1.326  |
| 20520218 | hsa-miR-5010-5p  | 2.782                 | 1.465   | 2.490            | 1.316  |

|          |                  |       |       |        |        |
|----------|------------------|-------|-------|--------|--------|
| 20504186 | hsa-miR-455-5p   | 2.023 | 0.746 | 2.424  | 1.278  |
| 20506835 | hsa-miR-1244     | 3.693 | 4.969 | -2.422 | -1.276 |
| 20505790 | hsa-miR-885-3p   | 5.331 | 4.062 | 2.410  | 1.269  |
| 20519472 | hsa-miR-4672     | 3.015 | 1.754 | 2.397  | 1.261  |
| 20525706 | hsa-miR-6872-3p  | 1.743 | 0.490 | 2.384  | 1.253  |
| 20522012 | hsa-miR-5681a    | 1.223 | 2.476 | -2.382 | -1.252 |
| 20515610 | hsa-miR-3180-3p  | 6.872 | 5.622 | 2.378  | 1.250  |
| 20517706 | hsa-miR-4257     | 3.911 | 2.672 | 2.359  | 1.238  |
| 20525446 | hsa-miR-6742-5p  | 2.696 | 1.469 | 2.341  | 1.227  |
| 20504407 | hsa-miR-652-5p   | 2.807 | 4.013 | -2.308 | -1.206 |
| 20525555 | hsa-miR-6797-5p  | 4.863 | 3.660 | 2.303  | 1.203  |
| 20517836 | hsa-miR-3622a-5p | 5.723 | 4.525 | 2.294  | 1.198  |
| 20500142 | hsa-miR-21-3p    | 3.660 | 2.467 | 2.287  | 1.194  |
| 20520329 | hsa-miR-5090     | 1.400 | 2.594 | -2.287 | -1.193 |
| 20518425 | hsa-miR-3180     | 6.964 | 5.776 | 2.278  | 1.188  |
| 20502446 | hsa-miR-451a     | 4.042 | 5.211 | -2.249 | -1.169 |
| 20500155 | hsa-miR-26b-3p   | 1.603 | 0.435 | 2.248  | 1.169  |
| 20506862 | hsa-miR-1266-5p  | 1.197 | 2.362 | -2.243 | -1.165 |
| 20520574 | hsa-miR-5194     | 1.186 | 2.351 | -2.242 | -1.165 |
| 20505608 | hsa-miR-675-5p   | 4.701 | 3.544 | 2.230  | 1.157  |
| 20503879 | hsa-miR-502-5p   | 1.601 | 0.450 | 2.220  | 1.151  |
| 20500720 | hsa-miR-23b-5p   | 2.913 | 4.050 | -2.200 | -1.138 |
| 20509235 | hsa-miR-1914-3p  | 4.715 | 3.578 | 2.200  | 1.137  |
| 20529784 | hsa-miR-8074     | 2.416 | 3.544 | -2.185 | -1.128 |
| 20518895 | hsa-miR-4499     | 2.603 | 3.727 | -2.180 | -1.124 |
| 20518850 | hsa-miR-4465     | 1.957 | 0.840 | 2.169  | 1.117  |
| 20521825 | hsa-miR-5585-3p  | 1.202 | 2.314 | -2.161 | -1.112 |
| 20504581 | hsa-miR-769-3p   | 2.215 | 1.113 | 2.146  | 1.102  |
| 20521811 | hsa-miR-664b-3p  | 5.075 | 3.975 | 2.143  | 1.100  |
| 20534752 | hsa-mir-155      | 0.820 | 1.916 | -2.138 | -1.097 |
| 20517696 | hsa-miR-4314     | 1.710 | 0.631 | 2.112  | 1.079  |
| 20515635 | hsa-miR-3194-5p  | 1.591 | 0.520 | 2.101  | 1.071  |
| 20517709 | hsa-miR-4260     | 1.899 | 0.830 | 2.099  | 1.069  |
| 20519554 | hsa-miR-4721     | 7.669 | 6.614 | 2.078  | 1.055  |
| 20519457 | hsa-miR-4665-5p  | 7.288 | 6.234 | 2.077  | 1.054  |
| 20518852 | hsa-miR-4467     | 8.675 | 7.622 | 2.075  | 1.053  |
| 20500186 | hsa-miR-101-3p   | 2.738 | 1.692 | 2.065  | 1.046  |
| 20506880 | hsa-miR-1278     | 2.244 | 1.200 | 2.062  | 1.044  |
| 20500170 | hsa-miR-92a-1-5p | 3.200 | 2.160 | 2.057  | 1.040  |
| 20515578 | hsa-miR-3157-3p  | 0.673 | 1.713 | -2.056 | -1.040 |
| 20501228 | hsa-miR-370-3p   | 2.839 | 1.806 | 2.046  | 1.033  |
| 20525679 | hsa-miR-6859-5p  | 1.196 | 2.225 | -2.040 | -1.028 |
| 20529788 | hsa-miR-8078     | 2.139 | 1.114 | 2.035  | 1.025  |
| 20500460 | hsa-miR-204-5p   | 1.050 | 2.072 | -2.031 | -1.022 |
| 20519695 | hsa-miR-4797-5p  | 3.460 | 4.482 | -2.030 | -1.022 |

|          |                 |       |       |        |        |
|----------|-----------------|-------|-------|--------|--------|
| 20537880 | hsa-mir-7162    | 0.532 | 1.550 | -2.026 | -1.019 |
| 20517745 | hsa-miR-4286    | 6.832 | 5.816 | 2.022  | 1.016  |
| 20522034 | hsa-miR-5699-5p | 1.259 | 2.273 | -2.020 | -1.015 |
| 20504310 | hsa-miR-582-3p  | 4.135 | 3.122 | 2.018  | 1.013  |

**Supplementary Table 5.** The sequences of walking primers of p-Smad3 combines the promoter of VASP.

| Primer | Sequence             |
|--------|----------------------|
| Site1F | GGGTGACAGCGAGAGACTAC |
| Site1R | AGGCCAAGCTTTGACATTAA |
| Site2F | TTCTGGGGGCTCAGGCAA   |
| Site2R | GCTTCCGCAGCGTGTCT    |

**Supplementary Table 6.** Antibodies used in this study

| Antigens            | Manufacturers                                       | Application                                        |
|---------------------|-----------------------------------------------------|----------------------------------------------------|
| VASP                | 610447, BD transduction Laboratory, San Jose, CA    | 1:500 for IF, 1:5000 for WB (46kDa), 1:300 for IHC |
| GAPDH               | AM4300, Invitrogen, Carlsbad, CA, USA               | 1:10000 for WB                                     |
| E-cadherin          | #14472, Cell Signaling Technology, Beverly, MA, USA | 1:1000 for WB, 1:400 for IF, 1:300 for IHC         |
| N-cadherin          | #13116, Cell Signaling Technology, Beverly, MA, USA | 1:1000 for WB, 1:400 for IF, 1:300 for IHC         |
| $\alpha$ -E-catenin | #3236, Cell Signaling Technology, Beverly, MA, USA  | 1:1000 for WB                                      |

|                  |                                                        |                                 |
|------------------|--------------------------------------------------------|---------------------------------|
| $\beta$ -catenin | #8480, Cell Signaling Technology,<br>Beverly, MA, USA  | 1:1000 for WB, 1:400 for<br>IF  |
| Fibronectin      | Ab2413, Cambridge, MA, USA                             | 1:1000 for WB                   |
| Vimentin         | #5741, Cell Signaling Technology,<br>Beverly, MA, USA  | 1:1000 for WB, 1:300 for<br>IHC |
| Snail            | #3879, Cell Signaling Technology,<br>Beverly, MA, USA  | 1:1000 for WB                   |
| Twist1           | #46702, Cell Signaling Technology,<br>Beverly, MA, USA | 1:1000 for WB                   |
| TIMP1            | #8946, Cell Signaling Technology,<br>Beverly, MA, USA  | 1:1000 for WB                   |
| TIMP2            | #5738, Cell Signaling Technology,<br>Beverly, MA, USA  | 1:1000 for WB                   |
| MMP2             | #13132, Cell Signaling Technology,<br>Beverly, MA, USA | 1:1000 for WB                   |
| MMP9             | #13667, Cell Signaling Technology,<br>Beverly, MA, USA | 1:1000 for WB, 1:300 for<br>IHC |
| Histone H3       | Ab4729, Cambridge, MA, USA                             | 1:3000 for WB                   |
| CRKL             | Ab15179, Cambridge, MA, USA                            | 1:1000 for WB, 1:400 for<br>IF  |
| HIF-1 $\alpha$   | #36169, Cell Signaling Technology,<br>Beverly, MA, USA | 1:1000 for WB                   |
| HIF-2 $\alpha$   | #7096, Cell Signaling Technology,<br>Beverly, MA, USA  | 1:1000 for WB                   |
| AKT              | #9272, Cell Signaling Technology,<br>Beverly, MA, USA  | 1:1000 for WB                   |
| p-AKT            | #4060, Cell Signaling Technology,<br>Beverly, MA, USA  | 1:1000 for WB                   |
| ERK              | #4695, Cell Signaling Technology,<br>Beverly, MA, USA  | 1:1000 for WB                   |
| p-ERK            | #4370, Cell Signaling Technology,                      | 1:1000 for WB                   |

|                  |                                                        |               |
|------------------|--------------------------------------------------------|---------------|
|                  | Beverly, MA, USA                                       |               |
| JNK              | #9252, Cell Signaling Technology,<br>Beverly, MA, USA  | 1:1000 for WB |
| p-JNK            | #9255, Cell Signaling Technology,<br>Beverly, MA, USA  | 1:1000 for WB |
| P38              | #8690, Cell Signaling Technology,<br>Beverly, MA, USA  | 1:1000 for WB |
| p-P38            | #4511, Cell Signaling Technology,<br>Beverly, MA, USA  | 1:1000 for WB |
| NF- $\kappa$ B   | #8242, Cell Signaling Technology,<br>Beverly, MA, USA  | 1:1000 for WB |
| p-NF- $\kappa$ B | #3033, Cell Signaling Technology,<br>Beverly, MA, USA  | 1:1000 for WB |
| p-SMAD2          | #18338, Cell Signaling Technology,<br>Beverly, MA, USA | 1:1000 for WB |
| p-SMAD3          | #9520, Cell Signaling Technology,<br>Beverly, MA, USA  | 1:1000 for WB |
| Rac1             | #4651, Cell Signaling Technology,<br>Beverly, MA, USA  | 1:1000 for WB |
| F-actin          | Ab205, Cambridge, MA, USA                              | 1:400 for IF  |

---

WB, western blotting; IHC, immunochemistry; IF, immunofluorescence; IP, immunoprecipitation
